# Supplementary material for: Antibacterial properties of electrospun Ti3C2Tz(MXene)/chitosan nanofibers
Source: Royal Society of Chemistry journal article supplement (doi:10.1039/c8ra06274a), 2018-01-01
Supplement: c8ra06274a1.pdf [file c8ra06274a1.pdf]

## Supporting Information

### Antibacterial Properties of Electrospun $\text{Ti}_3\text{C}_2\text{T}_z$ (MXene)/Chitosan Nanofibers

Elisa A. Mayerberger<sup>#</sup>, Reva M. Street<sup>#</sup>, Riki M. McDaniel, Michel W. Barsoum, Caroline L. Schauer<sup>\*</sup>

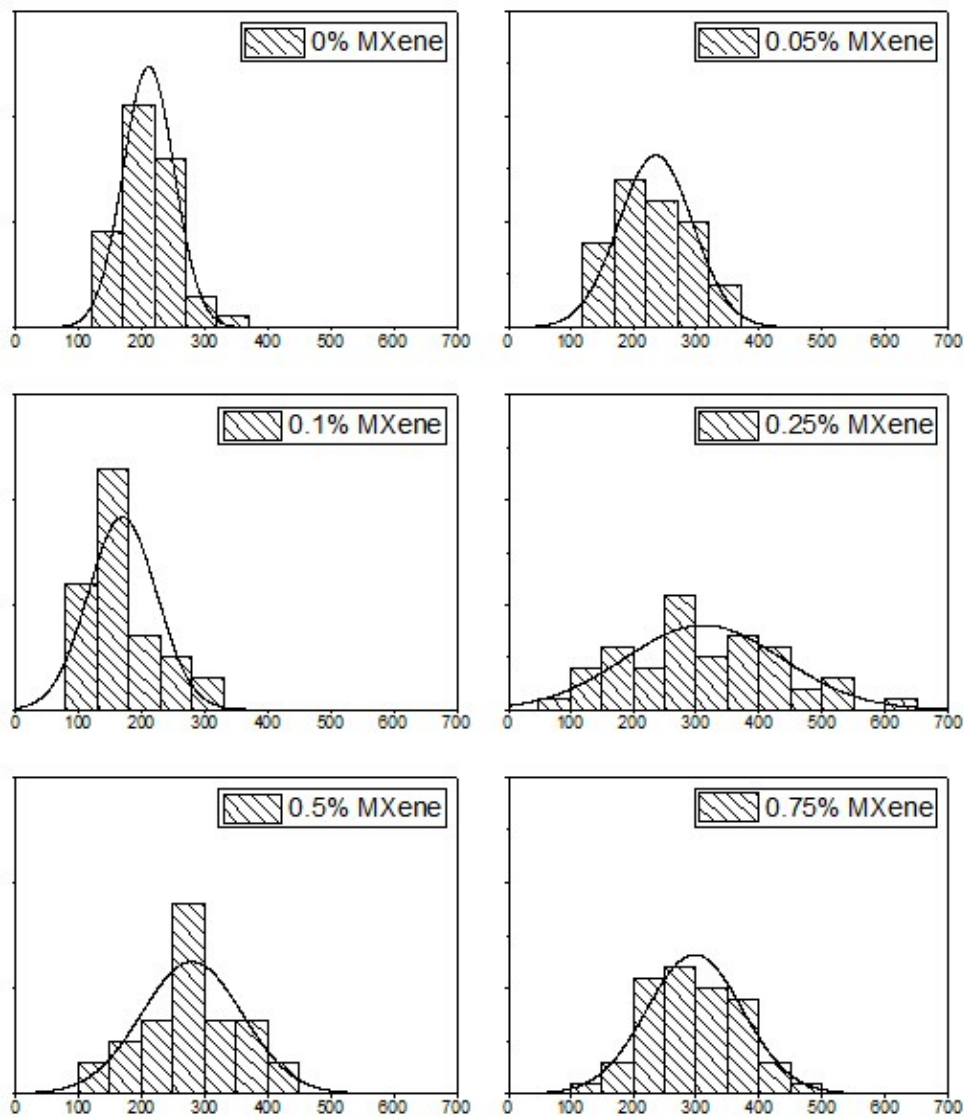

**Figure S1.** Fiber diameter distribution for the  $\text{Ti}_3\text{C}_2\text{T}_z$ /CS nanofibers.

**Table S1.** The antibacterial properties of select polymeric nanofibers with incorporated antibacterial agents such as metal oxides and 2D materials were compared. Materials were chosen based on antibacterial agent incorporation within the nanofibers as opposed to being decorated. Antibacterial activities of polymer blends were also compared.

| Nanofiber Antibacterial Activity Comparison |                             |                     |                                   |                                   |          |                  |                          |           |                     |      |
|---------------------------------------------|-----------------------------|---------------------|-----------------------------------|-----------------------------------|----------|------------------|--------------------------|-----------|---------------------|------|
| Carrier Polymer (%)                         | Antibacterial Agent         | Fiber amount used   | Gram (-) type, cell reduction (%) | Gram (+) type, cell reduction (%) | Time (h) | Support Material | Incorporation Method     | CL (Y/N)  | fiber diameter (nm) | Ref. |
| 10-15 wt% PU                                | 5 wt% ZnO                   | 7 g/m <sup>2</sup>  | <i>k. pneumoniae</i> , 98.7       | <i>s. aureus</i> 99.9             | NS       | cotton           | Dispersion               | N         | 300-700             | 63   |
| 11 wt% PVA                                  | 2 wt% TiO <sub>2</sub>      | 3 g/ m <sup>2</sup> | <i>k. pneumoniae</i> , 6.3        | <i>s. aureus</i> 99.3             | NS       | PP               | Dispersion               | N         | NS                  | 64   |
| 20 wt% N6                                   | 1 wt% TiO <sub>2</sub>      | 4 cm <sup>2</sup>   | <i>e.coli</i> , 0                 | NA                                | 4        | NA               | Dispersion               | N         | NS                  | 65   |
| 15 wt% PU                                   | 0.5 wt% TiO <sub>2</sub>    | 3.5 g               | <i>p. aeruginosa</i> , ~15        | <i>s. aureus</i> , ~10            | 2        | NA               | <i>In situ</i> synthesis | N         | 341                 | 66   |
| 15 wt% PU                                   | 0.5 wt% TiO <sub>2</sub>    | 3.5 g               | <i>p. aeruginosa</i> , ~35        | <i>s. aureus</i> , ~30            | 6        | NA               | <i>In situ</i> synthesis | N         | 341                 | 66   |
| 15 wt% PU                                   | 1 wt% TiO <sub>2</sub>      | 3.5 g               | <i>p. aeruginosa</i> , ~25        | <i>s. aureus</i> , ~20            | 2        | NA               | <i>In situ</i> synthesis | N         | 341                 | 66   |
| 15 wt% PU                                   | 1 wt% TiO <sub>2</sub>      | 3.5 g               | <i>p. aeruginosa</i> , ~55        | <i>s. aureus</i> , ~40            | 6        | NA               | <i>In situ</i> synthesis | N         | 341                 | 66   |
| 15 wt% PU                                   | 3 wt% TiO <sub>2</sub>      | 3.5 g               | <i>p. aeruginosa</i> , ~30        | <i>s. aureus</i> , ~30            | 2        | NA               | <i>In situ</i> synthesis | N         | 341                 | 66   |
| 15 wt% PU                                   | 3 wt% TiO <sub>2</sub>      | 3.5 g               | <i>p. aeruginosa</i> , ~75        | <i>s. aureus</i> , ~75            | 6        | NA               | <i>In situ</i> synthesis | N         | 341                 | 66   |
| 15 wt% PU                                   | 5 wt% TiO <sub>2</sub>      | 3.5 g               | <i>p. aeruginosa</i> , ~35        | <i>s. aureus</i> , ~40            | 2        | NA               | <i>In situ</i> synthesis | N         | 341                 | 66   |
| 15 wt% PU                                   | 5 wt% TiO <sub>2</sub>      | 3.5 g               | <i>p. aeruginosa</i> , ~85        | <i>s. aureus</i> , ~80            | 6        | NA               | <i>In situ</i> synthesis | N         | 341                 | 66   |
| 8 wt%PMMA                                   | 10 wt% ZnO/TiO <sub>2</sub> | 1 mg                | NS                                | <i>s. aureus</i> , 40             | 24       | NA               | <i>In situ</i> synthesis | N         | 100                 | 67   |
| 15 w/w% PLA                                 | 1 wt% ZnO                   | NS                  | <i>e. coli</i> , 9                | <i>s. aureus</i> , 0              | 24       | NA               | Dispersion               | N         | 700                 | 68   |
| 15 w/w% PLA                                 | 3 wt% ZnO                   | NS                  | <i>e. coli</i> , 26               | <i>s. aureus</i> , 27             | 24       | NA               | Dispersion               | N         | 710                 | 68   |
| 15 w/w% PLA                                 | 5 wt% ZnO                   | NS                  | <i>e. coli</i> , 15               | <i>s. aureus</i> , 95             | 24       | NA               | Dispersion               | N         | 790                 | 68   |
| 5 wt% PSf                                   | 0.1 wt% SWNTs               | 0.4 mg              | <i>e. coli</i> , 18               | NA                                | 1        | NA               | Dispersion               | N         | 256                 | 69   |
| 5 wt% PSf                                   | 0.5% SWNTs                  | 20 mg               | <i>e. coli</i> , 60               | NA                                | 1        | NA               | Dispersion               | N         | 274                 | 69   |
| 5 wt% PSf                                   | 1.0% SWNTs                  | 40 mg               | <i>e. coli</i> , 76               | NA                                | 1        | NA               | Dispersion               | N         | 293                 | 69   |
| <b>2.7 w/v% CS</b>                          | <b>0.75 wt% MX</b>          | <b>1 mg</b>         | <i>e. coli</i> , 95               | <b><i>s. aureus</i>, 62</b>       | <b>4</b> | <b>NA</b>        | <b>Dispersion</b>        | <b>GA</b> | 298 ± 76            |      |
| 12 wt% PLA                                  | 4 wt% CS                    | 20 mg               | <i>e. coli</i> , 52               | NA                                | 24       | NA               | Core/shell               | N         | 236 ± 87            | 70   |
| 12 wt% PLA                                  | 4 wt% CS                    | 20 mg               | <i>e. coli</i> , 44               | NA                                | 24       | NA               | Core/shell               | N         | 303 ± 165           | 70   |
| 12 wt% PLA                                  | 4 wt% CS                    | 20 mg               | <i>e. coli</i> , 22               | NA                                | 24       | NA               | Core/shell               | N         | 396 ± 336           | 70   |

|                   |          |       |                           |                        |    |     |          |      |         |               |
|-------------------|----------|-------|---------------------------|------------------------|----|-----|----------|------|---------|---------------|
| <b>15 wt% PET</b> | 4 wt% CS | 0.4 g | <i>k. pneumoniae</i> , 40 | <i>s. aureus</i> , 55  | 18 | PET | Blending | N    | 500-800 | <sup>31</sup> |
|                   | 100% CS  | 1 mg  | <i>e. coli</i> , 30.5     | <i>s. aureus</i> , 3.5 | 4  | N   | Blending | NaOH | 211±40  |               |
